# Supplementary material for: Zinc finger protein 277 is an intestinal transit-amplifying cell marker and colon cancer oncogene
Source: PubMed Central journal article supplement (PMC8876557; doi:10.1172/jci.insight.150894), 2022-02-22
Supplement: jciinsight-7-150894-s220.pdf [file jciinsight-7-150894-s220.pdf]

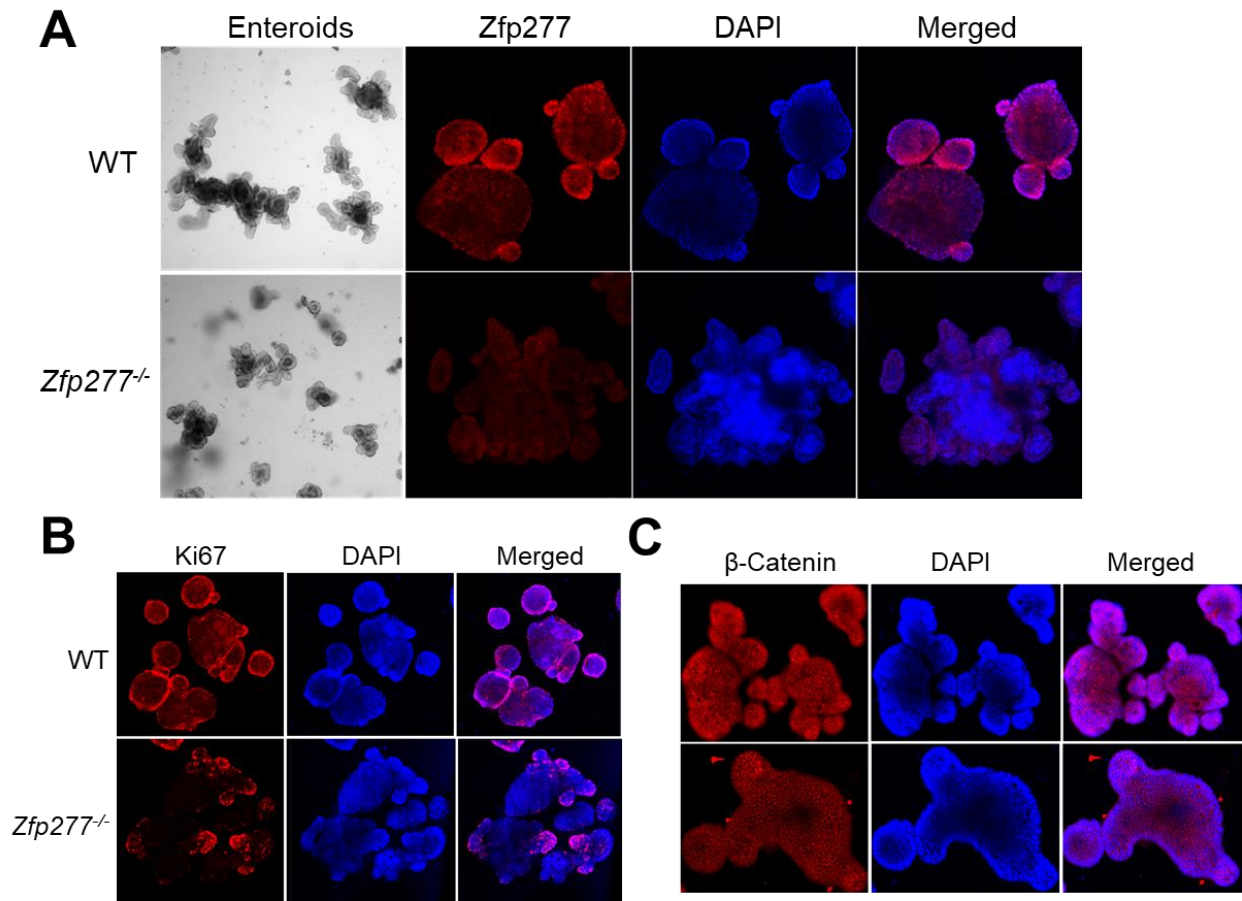

**Supplemental Figure 1. Zfp277, Ki67 and  $\beta$ -catenin expression in enteroids cultivated from WT and Zfp277<sup>-/-</sup> mice. (A) Representative light micrographs of enteroids, IF images of Zfp277, DAPI and merged confocal image of DAPI and Zfp277. (B and C) Representative confocal micrographs of enteroids stained with anti-Ki67 (B) and anti- $\beta$ -catenin antibodies (C) and merged images. 10X.**

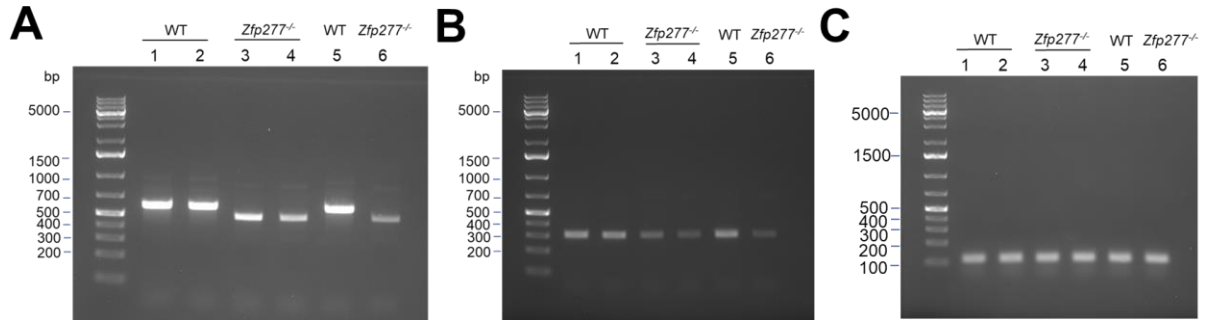

**Supplemental Figure 2. *Zfp277* transcript variant 1 and 2 levels in murine colon mucosa and small intestine enteroids. (A)** Variant 1 expression. Lanes 1 and 2, *Zfp277* mRNA RT-PCR product using cDNA prepared from colonic mucosa from two different WT mice. Lanes 3 and 4, *Zfp277* mRNA RT-PCR product using cDNA prepared from colon mucosa from two different *Zfp277*-deficient mice. Lane 5, *Zfp277* mRNA RT-PCR product using cDNA prepared from enteroids from WT mice. Lane 6, *Zfp277* mRNA RT-PCR product using cDNA prepared from enteroids from *Zfp277*-deficient mice. **(B)** Variant 2 expression. Lanes are the same as in A. **(C).** *Gapdh* RT-PCR. Lanes are the same as in A and B.

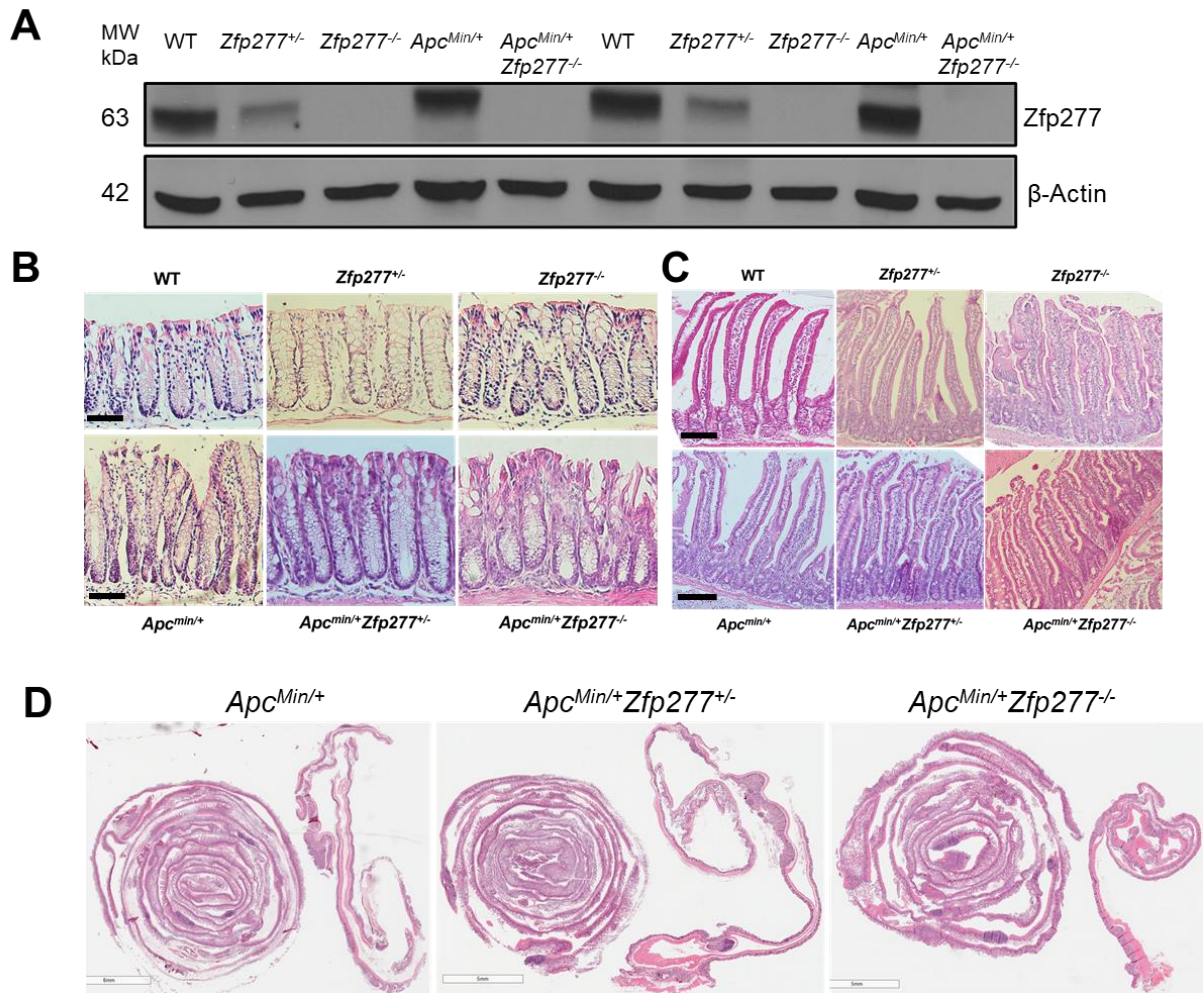

**Supplemental Figure 3. Characterization of *Zfp277* expression in transgenic mice. (A)** Representative *Zfp277* immunoblots using liver tissue extracts from WT, *Zfp277*<sup>+/-</sup>, *Zfp277*<sup>-/-</sup>, *Apc*<sup>Min/+</sup>, *Apc*<sup>Min/+</sup>*Zfp277*<sup>+/-</sup>, and *Apc*<sup>Min/+</sup>*Zfp277*<sup>-/-</sup> mice. **(B)** Representative H&E staining of colon sections from mice with the indicated genotypes. **(C)** Representative H&E staining of small intestine sections from mice with the indicated genotypes. **(D)** H&E staining of Swiss rolls of small intestines (left) and colons (right) from mice with the indicated genotypes (proximal section at center). Size bars, 100  $\mu$ M.

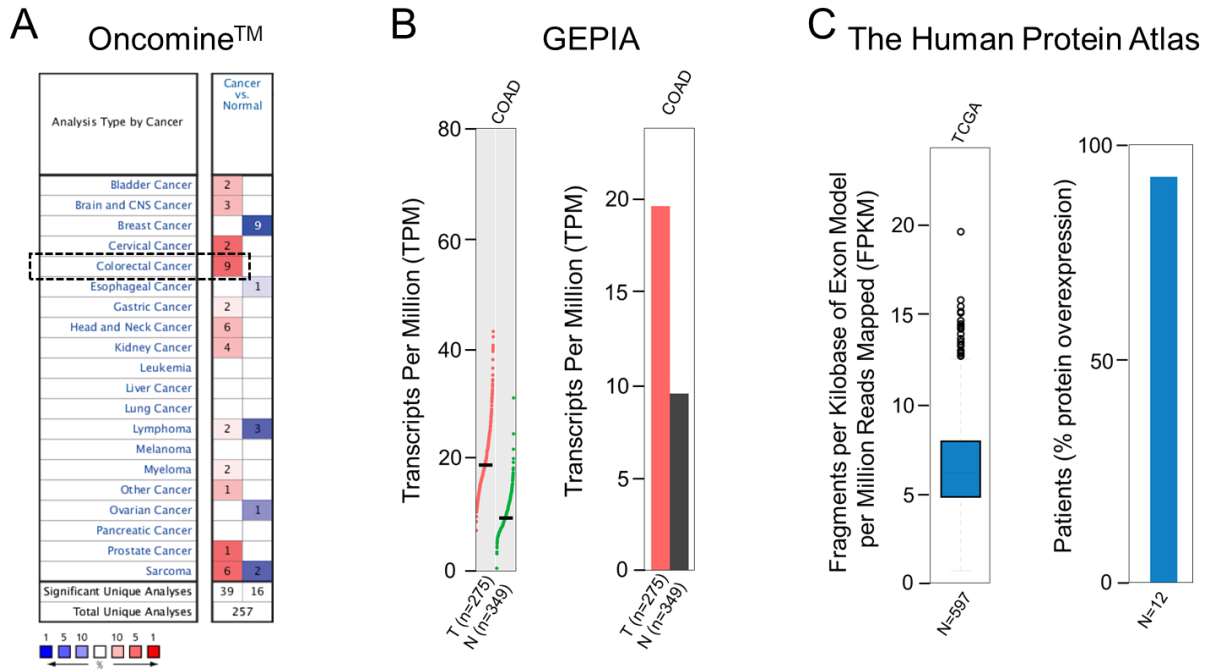

**Supplemental Figure 4. ZNF277 mRNA and protein overexpression in colon cancer reported in public cancer databases. (A)** Levels of *ZNF277* transcripts in colon cancer reported in the OncoPrint™ (A) and GEPIA (B) databases. (C) Levels of *ZNF277* protein in colon cancer reported in the Human Protein Atlas database.

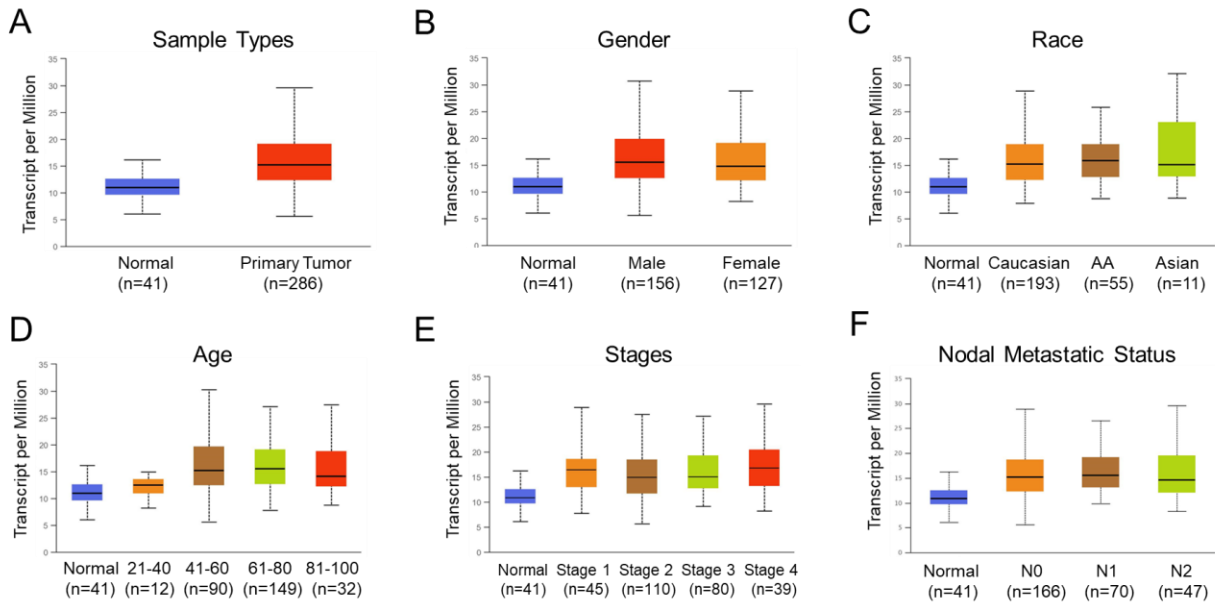

**Supplemental Figure 5. Box-whisker plots showing *ZNF277* mRNA overexpression in all stages of colon cancer compared with normal colon reported in the UALCAN server analysis. *ZNF277* transcript levels are increased in primary tumors (A), and in tumors regardless of gender (B), race (C), Age (D), colon cancer stages (E) and lymph node metastasis status (F). All  $P < 0.0001$ . Student's  $t$ -tests.**

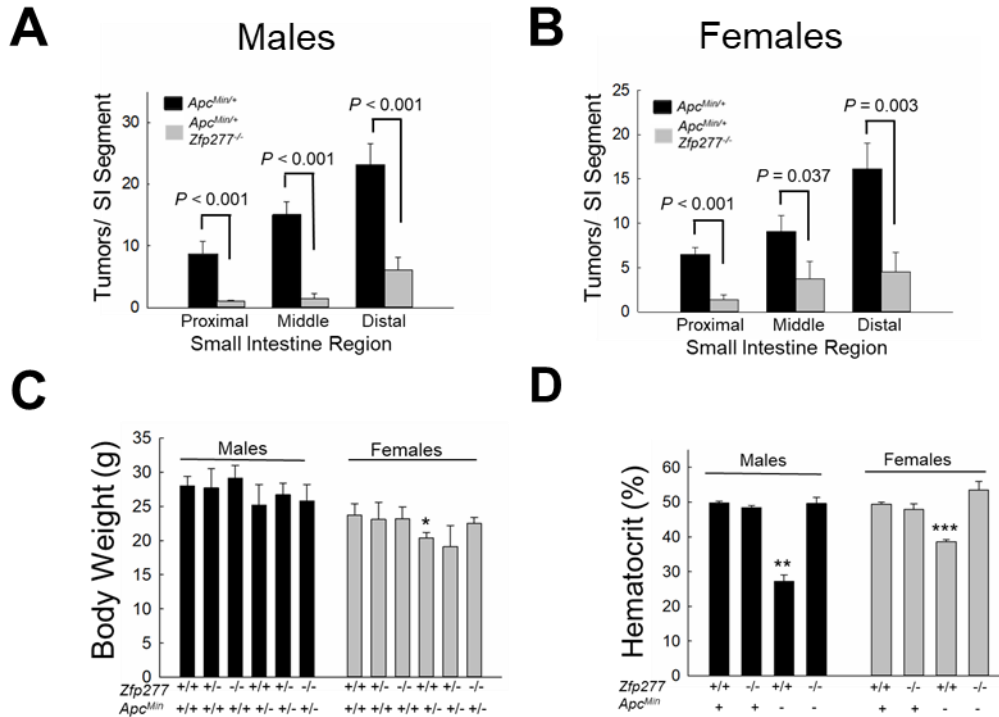

**Supplemental Figure 6. Zfp277 deficiency attenuates small intestinal neoplasia, increases body weight and hematocrits in 15-week-old *Apc<sup>Min/+</sup>* mice. (A and B) Numbers of small intestinal tumors in the proximal, middle and distal thirds of the small intestine of *Apc<sup>Min/+</sup>* and *Apc<sup>Min/+</sup>Zfp277<sup>-/-</sup>* male (A) and female (B) mice. Male *Apc<sup>Min/+</sup>* (n=12); Male *Apc<sup>Min/+</sup>Zfp277<sup>-/-</sup>* (n=10); Female *Apc<sup>Min/+</sup>* (n=10); Female *Apc<sup>Min/+</sup>Zfp277<sup>-/-</sup>* (n=9). Values represent means  $\pm$  SEM. Data were analyzed using the one- or two-tailed *t*-test or the Mann-Whitney *U* test. (C) Body weights of mice with the indicated genotypes. (D) Hematocrits of mice with the indicated genotype. Values represent means  $\pm$  SD. One-tailed *t*-test. \*  $P < 0.05$  vs. female *Apc<sup>Min/+</sup>* mice; \*\*  $P < 0.001$  vs. *Zfp277<sup>-/-</sup>Apc<sup>Min/+</sup>* mice; \*\*\*  $P = 0.002$  vs. female *Apc<sup>Min/+</sup>* mice. Body weights were measured in at least six 15-week-old mice of each genotype. Hematocrits were measured in three mice of each genotype.**



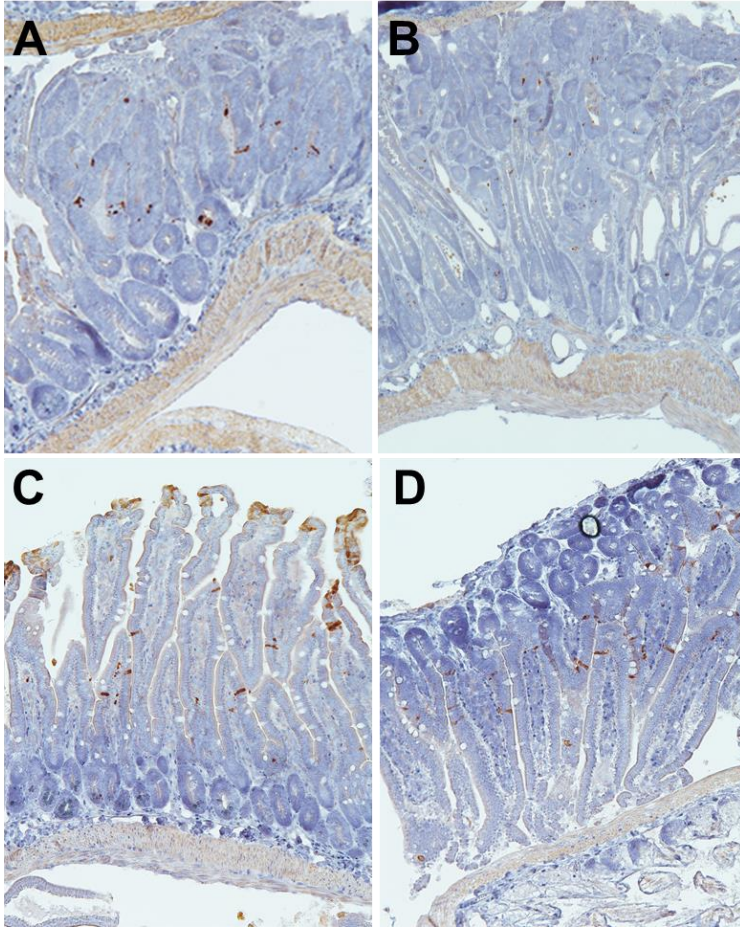

**Supplemental Figure 7. *Zfp277* deficiency does not affect apoptosis. (A and B).** Images of cleaved caspase 3 IHC staining of small intestine adenomas from *Apc*<sup>Min/+</sup> (A) and *Apc*<sup>Min/+</sup>*Zfp277*<sup>-/-</sup> (B) mice. (C and D). Images of cleaved caspase 3 IHC staining of small intestines from *Apc*<sup>Min/+</sup> (C) and *Apc*<sup>Min/+</sup>*Zfp277*<sup>-/-</sup> (D) mice.

# Supplemental Table 1

## Antibodies used in this study

| Antibody                                | Catalog Number      | Lot Number | WB (h) | WB (m) | HRP IHC | IF | ChIP |
|-----------------------------------------|---------------------|------------|--------|--------|---------|----|------|
| ZNF277                                  | INV-PA555577        |            |        |        | ✓       | ✓  |      |
| ZNF277                                  | PTG-25094-1-AP      | 21820      | ✓      | ✓      |         |    |      |
| BM1                                     | ABM-ab14389-25ug    |            |        |        | ✓       | ✓  |      |
| BM1                                     | CST #6964S          | 3          | ✓      |        |         |    |      |
| P16ink4a/cdkn2a                         | RND-NB200-106SS     |            |        |        | ✓       |    |      |
| p16INK4A                                | 92803T              | 1          | ✓      |        |         |    |      |
| p21WAF1                                 | RND-NBP2-29463-20ug | 1026-      |        | ✓      |         |    |      |
| p21WAF1                                 | CST #2947           | 11         | ✓      |        |         |    |      |
| p27KIP1                                 | CST 3686S           | 5          | ✓      |        |         |    |      |
| p14ARF                                  | CST #2407S          | 5          | ✓      |        |         |    |      |
| p15ink4b/cdkn2b                         | RND-MAB6798-SP      |            |        |        |         |    |      |
| p57KIP2                                 | CST-2557T           | 2          | ✓      |        |         |    |      |
| Keratin (KRT) 20                        | CST-13063S          | 1          |        |        | ✓       | ✓  |      |
| β-Catenin                               | PMG-610153          | 7187864    | ✓      | ✓      |         |    | ✓    |
| Ki67                                    | INV-MA514520        |            |        |        | ✓       | ✓  |      |
| Ki67                                    | PMG-550609          |            |        |        | ✓       | ✓  |      |
| Ki67                                    | HPA000451-100UL     |            |        |        | ✓       | ✓  |      |
| p19ARF/CDKN2A Antibody                  | NB200-106SS         |            |        |        |         |    |      |
| Cleaved Caspase-3                       | CST-9664S           |            |        |        | ✓       | ✓  |      |
| Goat Anti-rabbit IgG , Alexa Fluor 555  | INV-A21429          |            |        |        | ✓       | ✓  |      |
| Goat Anti-mouse IgG, Alexa Fluor 555    | INV-A21422          |            |        |        | ✓       | ✓  |      |
| Goat Anti-rabbit IgG, Alexa Fluor488    | INV-A11034          |            |        |        | ✓       | ✓  |      |
| Goat Anti-mouse IgG,Alexa Fluor488      | INV-A11029          |            |        |        | ✓       | ✓  |      |
| Donkey Anti-rabbit IgG, Alexa Fluor 555 | INV-A31572          |            |        |        | ✓       | ✓  |      |
| Donkey Anti-goat IgG, Alexa Fluor 488   | INV-A11055          |            |        |        | ✓       | ✓  |      |
| GAPDH                                   | sc-47724            | D2117      | ✓      | ✓      |         |    |      |
| β-actin                                 | PTG-60008-1-Ig      | 10004413   | ✓      | ✓      |         |    |      |
| Lamin B1                                | CST-13435           |            | ✓      |        |         |    |      |
| RNA Polymerase II                       | Thermo Scientific   |            |        |        |         |    | ✓    |
| rabbit IgG                              | Thermo Scientific   |            |        |        |         |    | ✓    |
| Mouse IgG                               | Thermo Scientific   |            |        |        |         |    | ✓    |



## Supplemental Table 2

PCR Primer sequences

| <b>Genes</b>              | <b>Forward primer sequence 5' to 3'</b> | <b>Reverse primer sequence 5' to 3'</b> |
|---------------------------|-----------------------------------------|-----------------------------------------|
| <i>ZNF277</i>             | ACAGCAGCAAGAACGAAATG                    | TGGCAATCCAATGTTGAAAG                    |
| <i>p21<sup>WAF1</sup></i> | GCGGTTGAATGAGAGGTTCC                    | AAGGAGAACACGGGATGAGG                    |
| <i>Zfp277</i>             | TACTGTGCCAGGTAATGGCTG                   | TTCGGAAATCTGCAACGAGC                    |
| <i>Isoform 1</i>          |                                         |                                         |
| <i>Zfp277</i>             | GTGCCAGGTAATGGCTGCTA                    | TGGCCATGTGGTTCAACAGT                    |
| <i>Isoform 2</i>          |                                         |                                         |
| <i>HOXD13</i>             | CTTCGGCAACGGCTACTACA                    | CTTCTCCACGGGAAAGCCTC                    |
| <i>ZNF277</i>             | AGATCACTAAAGCATGTTCCCC                  | TGGTTGGGGAAAGTGGAGAT                    |
| <i>ChIP 1</i>             |                                         |                                         |
| <i>ZNF277</i>             | TGGCAAAGACTCCTCTGACA                    | AGTTTGACCTGAACCCACCT                    |
| <i>ChIP 2</i>             |                                         |                                         |
| <i>ZNF277</i>             | GGAGGAGGAAAAGGAAGGGA                    | AGGAACAGGATAGCTCTCGC                    |
| <i>ChIP 3</i>             |                                         |                                         |
| <i>ZNF277</i>             | TCACCCACGCCGATTTTCT                     | GGGACTGTGCATTGTTGTGA                    |
| <i>ChIP 4</i>             |                                         |                                         |
| <i>GAPDH</i>              | CCCCATGGTGTCTGAGCG                      | CGACAGTCAGCCGCATCTT                     |
| <i>Gapdh</i>              | GGTGAAGGTCGGTGTGAAC                     | TGATGGCAACAATCTCCACT                    |
| <i>(m)</i>                |                                         |                                         |

## Supplemental Table 3

Differentially-expressed Zfp277 target genes identified by RNA-Seq using murine colonic mucosa. Increased expression in red and decreased expression in blue.

| Zfp277 Gene Pathways identified by DAVID | Gene names                                                                                                                                                                                                                    |
|------------------------------------------|-------------------------------------------------------------------------------------------------------------------------------------------------------------------------------------------------------------------------------|
| Anterior/posterior pattern specification | Hoxd9, Hhex, Hoxc8, Wnt3, Msx1, Sfrp1, Ifitm1, Sfrp2, Hoxd13, Gli2, Hoxd10, Hoxd11                                                                                                                                            |
| Pathway in cancer                        | Flt3, Gli1, Gli2, Hhip, Rasgrp3, Adcy7, Bdkrb2, Cxcl12, F2r, Csf1r, Csf3r, Ccne1, Fgf18, Fzd6, Fzd9, Lama2, Lef1, Mmp2, Mmp9, Nos2, Pdgfra, Rxrg, Spi1, Wnt3, Wnt4, Wnt8b                                                     |
| MAPK/ERK1/2                              | Ren1, Grin2B, Tlr13, Gdf10, Pik3ap1, Bmp5, Bmp8b, Bmp6, Fgf18, Ccl2, Ccl21a, Ptpn22, Ccl8, Ccl5, Cd74, Ccl11, Ccl12, Ccl22, Gm10591, C1qtnf3, Pdgfra, Gpnmb, Pla2g5, Csf1r, F2r                                               |
| Canonical Wnt signaling                  | Fz9, Fzd6, Wnt4, Wnt3, Wnt8b, Daam2, Sfrp1, Sfrp2, Lef1, Ptpu, Snai2, Gli1, Cam2b                                                                                                                                             |
| Cytokine-cytokine receptor interaction   | Relt, Ccl11, Ccl12, Ccl2, Ccl22, Ccl3, Ccl4, Ccl5, Ccl8, Ccr10, Ccr2, Ccr5, Ccr6, Cxcl12, Cxcl14, Cxcr5, Cx3cr1, Csf1r, Csf2rb2, Csf3r, Il10ra, Il18rap, Il2ra, Il6ra, Il7r, Il9r, Lep, Lifr, Ltb, Gm10591, Gm1987, Tnfrsf13b |

## Supplemental Table 4

Differentially-expressed ZNF277 target genes identified by RNA-Seq in human HT29 cells. Increased expression in red and decreased expression in blue.

| Top ZNF277 Gene Pathways and functional annotation clustering identified by DAVID | Gene names                                                                                                                                                                                                                             |
|-----------------------------------------------------------------------------------|----------------------------------------------------------------------------------------------------------------------------------------------------------------------------------------------------------------------------------------|
| Pathway in cancer                                                                 | GNAI1, GNG4, KITLG, RASGPR2, WNT3A, WNT7A, WNT9A, WNT10B, WNT16, BMP4, F2R, COL4A3, COL4A4, COL4A5, COL4A6, CSF2RA, CCND1, CDKN1A (p21 <sup>WAF1</sup> ), CYCS, EDNRA, FGF2, FGFR1, LAMA4, LAMC3, LPAR1, LPAR3, PTGS2, RET, STAT1, SMO |
| Signaling pathways regulating pluripotency of stem cells                          | LHX5, SMAD9, WNT3A, WNT7A, WNT9A, WNT10B, WNT16, BMP4, BMPR2, DUSP9, ESRRB, FGF2, FGFR1, LIFR, ONECUT1, PAX6                                                                                                                           |
| Proteoglycans in cancer                                                           | TIAM1, WNT3A, WNT7A, WNT9A, WNT10B, WNT16, CAV1, CAV2, CCND1, CDKN1A, EZR, FGF2, FGFR1, FLNC, ITGA5, PLAU, SMO                                                                                                                         |
| PI3K-AKT signaling pathway                                                        | GNG4, KITLG, CREB3L1, F2R, COL4A3, COL4A4, COL4A5, COL4A6, COL6A1, COL6A2, CCND1, CDKN1A, FGF2, FGFR1, ITGA5, LAMA4, LPAR1, LPAR3, OSMR, PPKAA2, PPP2R2C, SGK1                                                                         |
| HOX (Homeobox)                                                                    | LHX2, LHX5, LHX6, LMX1B, MEIS2, NKX1-2, NKX2-8, NKX6-1, TLX3, GBX2, HOXD8, IRX3, IRX4, MKX, MSX1, ONECUT1, ONECUT3, PAX6, PITX3, PRRX2, SHOX2, ZFHX4                                                                                   |
